# Supplementary material
Source: HighWire-hosted journal article supplement (https://bjsm.bmj.com/content/57/1/46)
Supplement: inline-supplementary-material-4 [file inline-supplementary-material-4.xlsx]

## Sheet: Injury aetiologies
Online appendix 4. Injury aetiology distribution in female and male athletes in the Olympic sports. Values are number of injuries.
Sport		Number of athletes			Contact (with another athlete)		Non-contact trauma		Overuse (sudden onset)		Overuse (gradual onset)		Contact (with stagnant object)		Contact (with moving object)		Recurrence of previous injury		Other cause not otherwise specified		n/a		Field of Play conditions		Equipment failure		Weather conditions		Violation of rules		Grand total
		Women	Men		Women	Men	Women	Men	Women	Men	Women	Men	Women	Men	Women	Men	Women	Men	Women	Men	Women	Men	Women	Men	Women	Men	Women	Men	Women	Men	Women	Men
Archery		64	64					1			1		1								1										3	1
Artistic gymnastics		98	98				3	2	4		2		5	3			1						1								16	5
Artistic swimming		104			2		1		1		1								1												6	0
Athletics		957	1069		3	7	36	41	22	30	18	19	5	9	1	4	6	3		4	2	2		2							93	121
Badminton		86	86						1		2	3					1	1	1												5	4
Baseball/softball		90	144			1		1	2	3		3		2		3				1								3			2	17
Basketball - 3x3		32	32		3	1		1			1					1															4	3
Basketball - 5x5		144	144		5	3	1	1	4	2	2			1	1		1						1								15	7
Boxing		103	188		12	52	2	2					1			7		2						1							15	64
Canoe - Slalom		41	41					1										1		1											0	3
Canoe - Sprint		122	126				1			1	1	2								1											2	4
Cycling - BMX Freestyle		9	9				1				1			1								1									2	2
Cycling - BMX Racing		24	24		1				1				2	6	1	2															5	8
Cycling - MTB		38	38					1					2		1								1								4	1
Cycling - Road		70	131		1	1							1																		2	1
Cycling - Track		89	99		2			1					1	2	1			1				1									4	5
Diving		72	71									1	1																		1	1
Equestrian		75	126							2		1	1	1		2															1	6
Fencing		110	115		1	2	2	6	3	2	2	1	1	1		1															9	13
Football		218	289		10	13	2	5	3	2				2		3							1								16	25
Golf		60	60				1	3		4	3	4								1	1				1						6	12
Handball		173	175		9	7	5	10	3	3	2	3	4	1	3	5		1	1			2	2	1							29	33
Hockey		195	193		5	2	3	4	1	2	7	1	1	1	4	5					1	1									22	16
Judo		192	199		18	10	3	3	2	3		1	2	1	7	4			2			1									34	23
Karate		39	42		2	4			1	1	2				2			1			1			1							8	7
Marathon swimming		25	26			1																									0	1
Modern pentathlon		36	36				2	1	1		1	1	1	1					1				1								7	3
Rhythmic gymnastics		96							3								1		1												5	0
Rowing		258	264					1	2	1		1		1					1	1	1										4	5
Rugby		146	146		9	12	2	2		1	1		3		4	2			1		2			1							22	18
Sailing		175	175				1	3	2		2	2	2	2	1	2	1					1									9	10
Shooting		177	178					1	2			2	2									1									4	4
Skateboarding		41	40			1	1					1	4	8						1					1						6	11
Sport climbing		20	20										2	2					1	1											3	3
Surfing		20	20				2	1				1	1																		3	2
Swimming		399	476				1	4	2	6	3	4	2	3								2				1					8	20
Table tennis		89	85				2	2		8	3	1	1	2					1												7	13
Taekwondo		65	65		7	8	1			1							1			1											9	10
Tennis		94	97				2	1		3		2																			2	6
Trampoline gymnastics		16	16				1	1					1																		2	1
Triathlon		55	56		1		2	1	1		1		4	2											1						10	3
Volleyball - Beach		48	48			1	2		3		1					1	1			1											7	3
Volleyball - Indoor		144	144		4	2	5	6	3	1	3	2	1		1			1	1			2									18	14
Water polo		120	145		4	12		2	1	2		1	1		2				1	1				1						1	9	20
Weightlifting		98	99		1		2	6	2		3	1	1				1	2		1									1		11	10
Wrestling		96	193		7	17	2			1	1	3	2	3	3	2	1	2	1	1											17	29
Grand Total		5423	5892		107	157	89	115	70	79	64	61	56	55	32	44	15	15	14	16	9	14	7	7	3	1	0	3	1	1	467	568
